# Supplementary material for: Soft while strong mechanical shock tolerable e-skins
Source: Royal Society of Chemistry journal article supplement (doi:10.1039/d1ta10746a), 2022-01-01
Supplement: d1ta10746a1.pdf [file d1ta10746a1.pdf]

### **Soft while Strong Mechanical Shock Tolerable e-Skins**

Yanan Wang,<sup>ab</sup> Baicun Hao<sup>b</sup>, Yujia Wang<sup>b</sup>, Yingjie Wei<sup>b</sup>, Xin Huang<sup>\*ab</sup> and Bi Shi<sup>ab</sup>

<sup>a</sup> National Engineering Laboratory for Clean Technology of Leather Manufacture, Sichuan University, Chengdu 610065, P.R. China.

<sup>b</sup> Department of Biomass Chemistry and Engineering, Sichuan University, Chengdu 610065, P.R. China. E-mail address: xhuangscu@163.com (X. Huang)

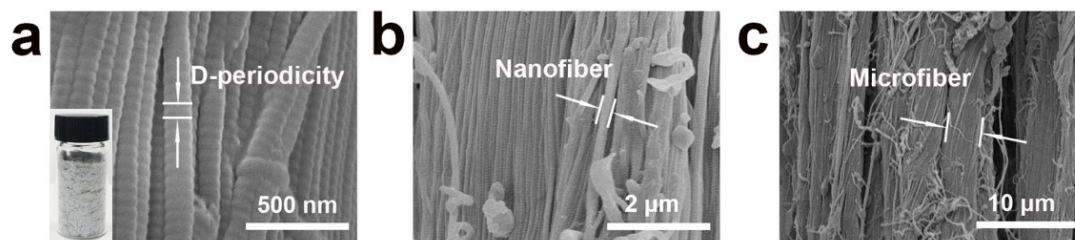

**Fig. S1** FESEM images of WCFs showing (a) the D-period structure, (b) nanofibers and (c) microfibers (inset in a shows the digital photo of WCFs).

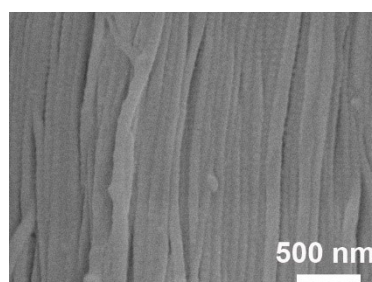

**Fig. S2** FESEM image showing the microstructure of CFS-3.

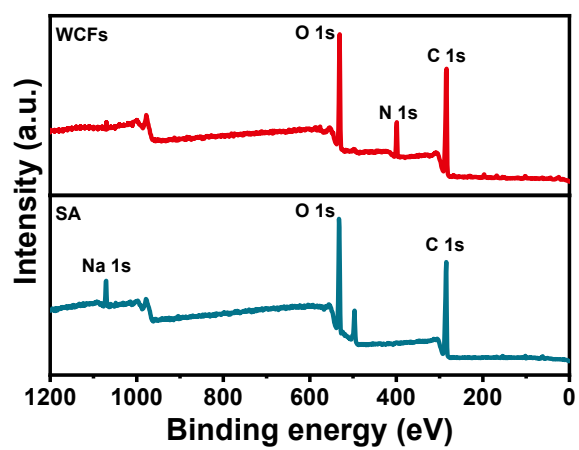

**Fig. S3** XPS survey scans of WCFs and SA.

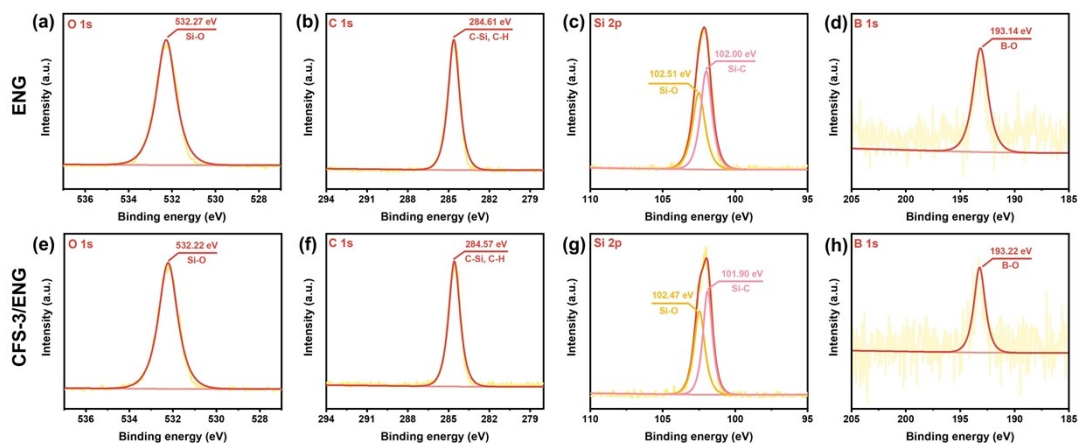

**Fig. S4** O 1s, C 1s, Si 2p and B 1s XPS spectra of (a-d) ENG and (e-h) CFS-3/ENG, respectively.

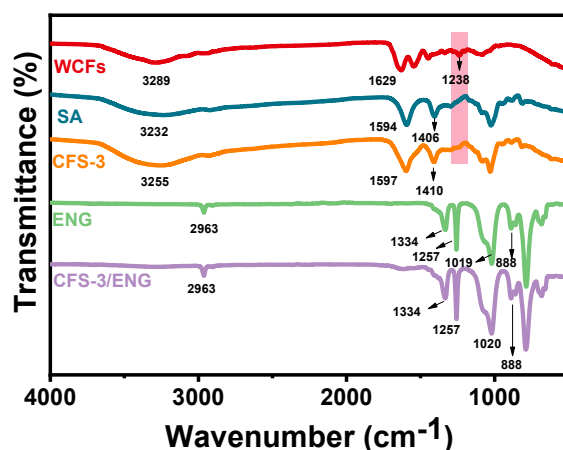

**Fig. S5** FTIR spectra of WCFs, SA, CFS-3, ENG and CFS-3/ENG.

As shown in Fig. S4, the peaks at 3289, 1629 and 1238  $\text{cm}^{-1}$  of WCFs are assigned to the stretching vibration of -OH, C=O and C-N, respectively [1]. The characteristic adsorption peaks of SA appear at 3232, 1594 and 1406  $\text{cm}^{-1}$ , which are ascribed to the -OH, C=O and C-OH stretching bands, respectively [2]. The FTIR spectrum of CFS-3 shows the characteristic absorption peaks of SA due to the coverage of SA on WCFs. The -OH stretching vibration bands of WCFs and SA appear at 3289  $\text{cm}^{-1}$  and 3232  $\text{cm}^{-1}$ , respectively, while that of CFS-3 shifts to 3255  $\text{cm}^{-1}$ , suggesting the formation of hydrogen bonding between WCFs and SA [3].

**Table S1** Tensile mechanical properties of CFS-3, CFS-3/ENG, conductive CFS-3 and

conductive CFS-3/ENG.

| Material             | Tensile strength<br>(MPa) | Elongation at<br>break (%) | Toughness<br>(MJ m <sup>-3</sup> ) |
|----------------------|---------------------------|----------------------------|------------------------------------|
| CFS-3                | 0.08                      | 6.71                       | 0.28                               |
| CFS-3/ENG            | 0.20                      | 10.6                       | 1.00                               |
| Conductive CFS-3     | 0.09                      | 4.60                       | 0.20                               |
| Conductive CFS-3/ENG | 0.22                      | 6.34                       | 0.65                               |

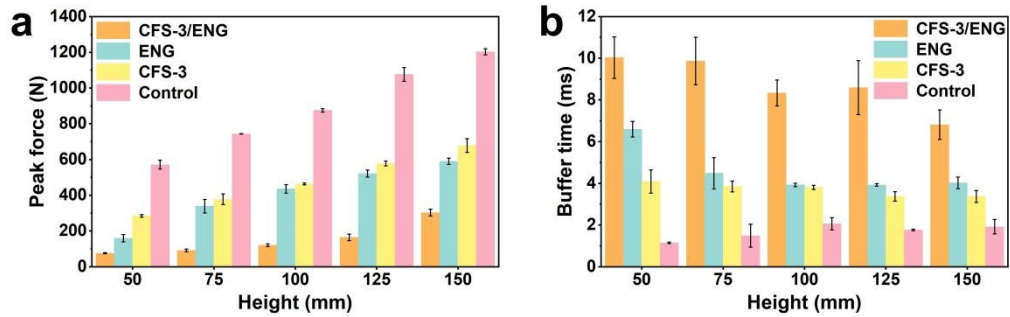

**Fig. S6** The (a) peak force and (b) buffer time of control, CFS-3, ENG and CFS-3/ENG during the drop hammer tests with the drop heights of 50-150 mm.

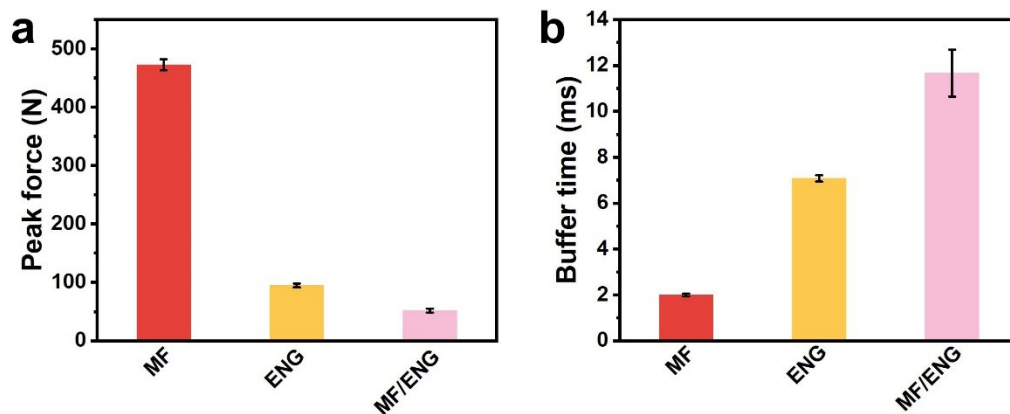

**Fig. S7** (a) The peak force and (b) buffer time of MF, ENG and MF/ENG at the drop height of 50 mm.

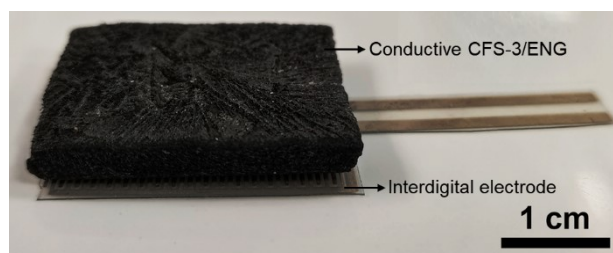

**Fig. S8** The digital photo of MST e-skin.

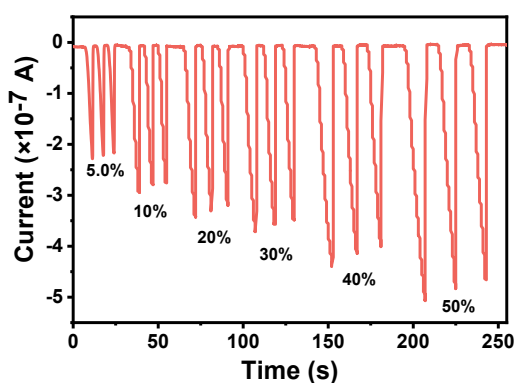

**Fig. S9** *I-t* curve of MST e-skin for the detection of different mechanical deformation (5.0-50%).

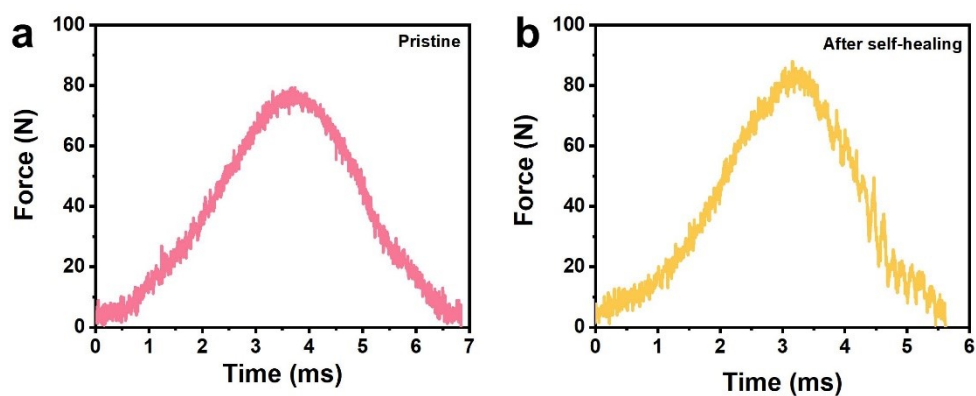

**Fig. S10** The force-time curves of the (a) pristine and (b) self-healed MST e-skin during the punch by the hammer (2.36 kg) with the drop height of 20 mm.

## References

- [1] G. Y. Chen, Y. N. Wang, Y. J. Wang, H. Z. Xiao, X. Huang, B. Shi, *J. Mater. Chem. A* **2020**, *8*, 24388.
- [2] S. K. Papageorgiou, E. P. Kouvelos, E. P. Favvas, A. A. Sapolidis, G. E. Romanos and F. K. Katsaros, *Carbohydr. Res.* **2010**, *345*, 469.
- [3] Z. Wang, S. F. Hu and H. Y. Wang, *J. Food Quality* **2017**, 4954259.
